# Supplementary material
Source: PubMed Central journal article supplement (PMC3934491)
Supplement: NIHMS556232-supplement-Supplementary_Text.pdf [file NIHMS556232-supplement-Supplementary_Text.pdf]

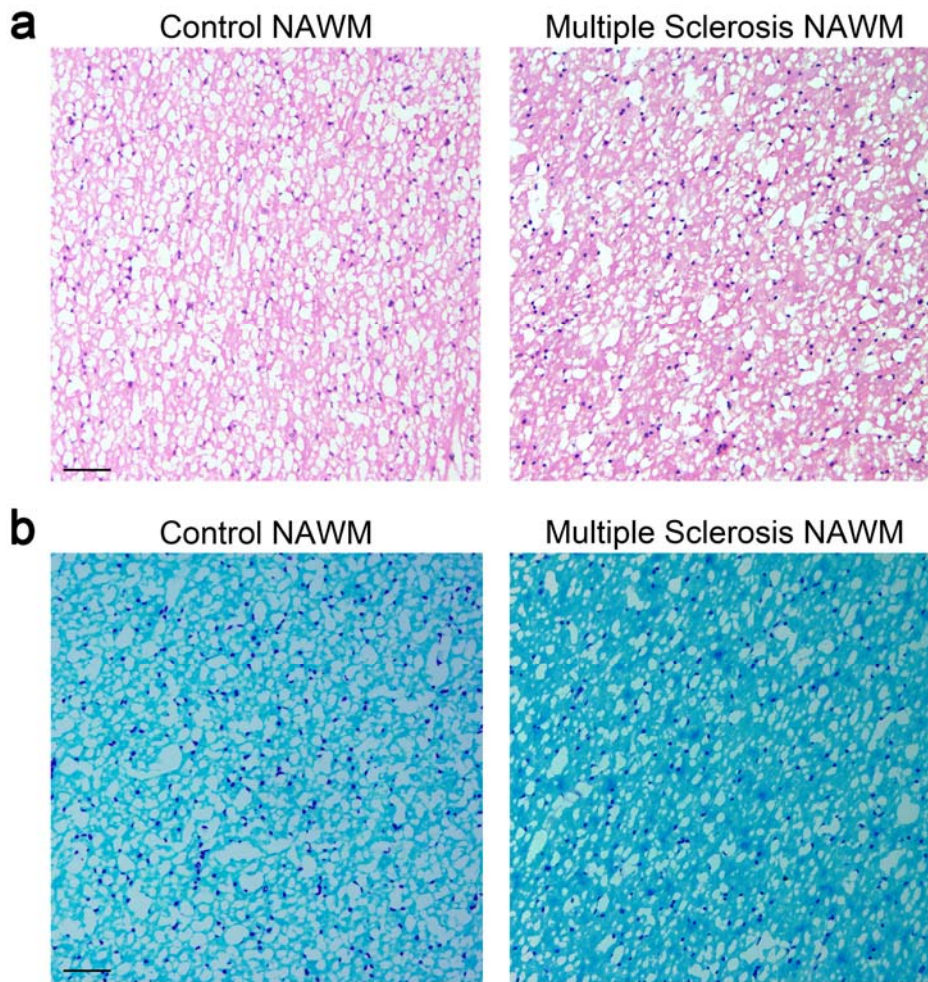

**Supplementary Figure 1.** Hematoxylin and eosin and Luxol fast blue staining shows absence of overt inflammation and demyelinating lesions. (a) Representative hematoxylin and eosin staining for control (n=5 brain samples) and multiple sclerosis (n=15 brain samples) sections shows an absence of inflammatory infiltrates. (b) Representative Luxol fast blue staining for control (n=5 brain samples) and multiple sclerosis (n=15 brain samples) sections shows an absence of demyelinating lesions. Scale bar = 100  $\mu$ m. NAWM, normal-appearing white matter.

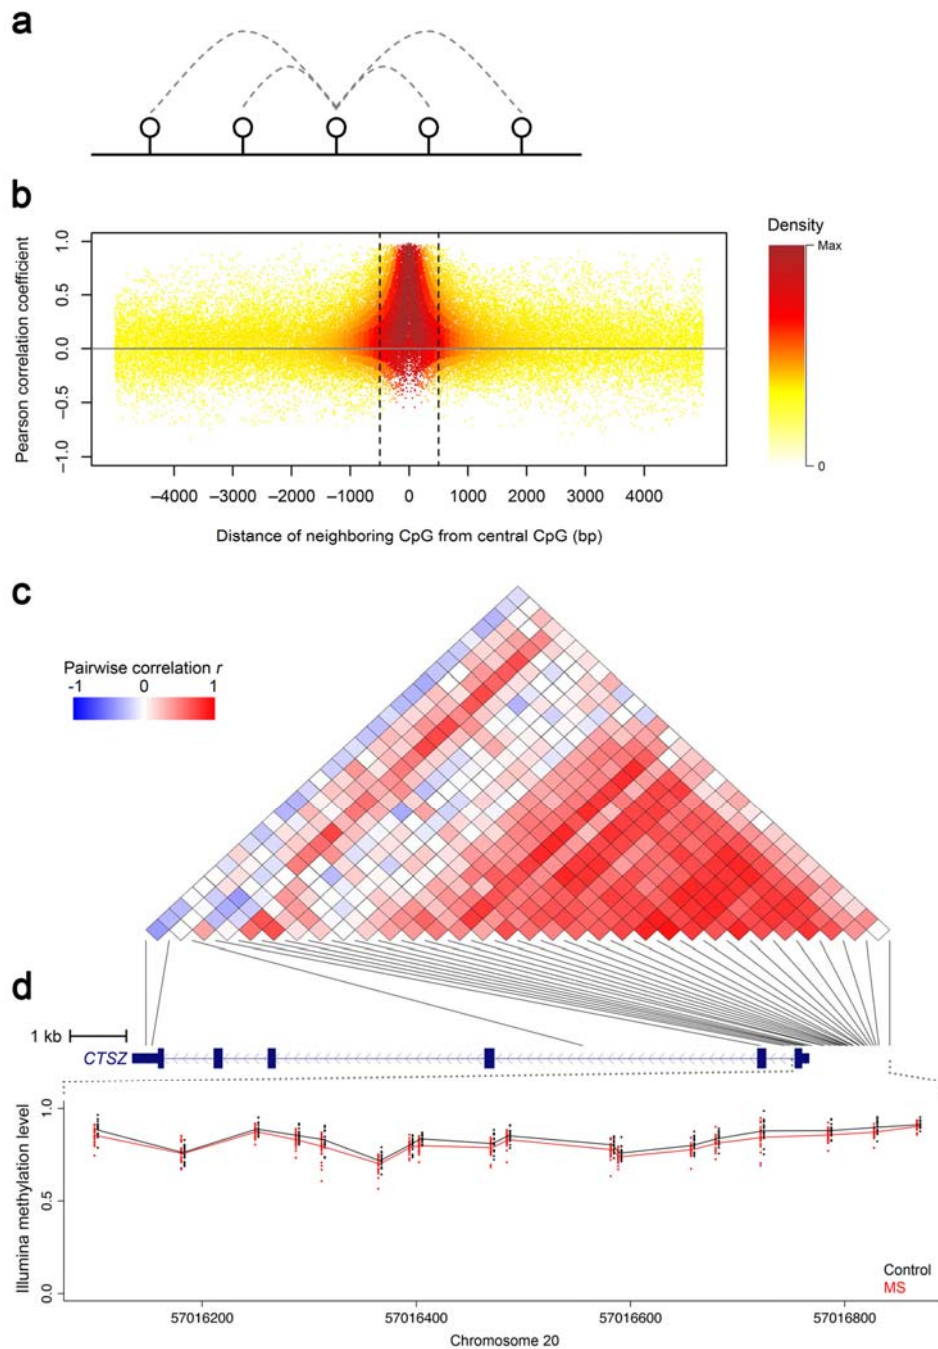

**Supplementary Figure 2.** Pairwise comparison of neighboring CpGs shows high correlation within a 1-kb window. (a) Schematic of pairwise comparison between the central CpG within DMRs and neighboring CpGs. (b) A  $\pm 5$  kb window was extended around each CpG within the DMRs. Pearson correlation was calculated for each CpG (central CpG) and the neighboring CpGs within each respective window. Vertical dashed lines demarcate 1-kb window ( $\pm 500$  bp) around the central CpG, which shows the strongest level of correlation. Heatmap shows density of correlations. (c) DNA methylation block shows pairwise Pearson correlation between CpGs in the promoter and gene body of *CTS2Z*. Lines connect with the gene structure below at the location of the corresponding CpG. (d) Plot of DNA methylation levels for individual CpGs within a hypomethylated DMR in the promoter of *CTS2Z* as measured by Illumina array. Above the plot is the complete gene structure, with dashed lines indicating the zoomed region containing the DMR shown in the plot. Methylation levels for individual MS cases and controls are plotted in red and black, respectively, with red and black lines connecting the mean methylation level for each consecutive CpG assayed. MS, multiple sclerosis.

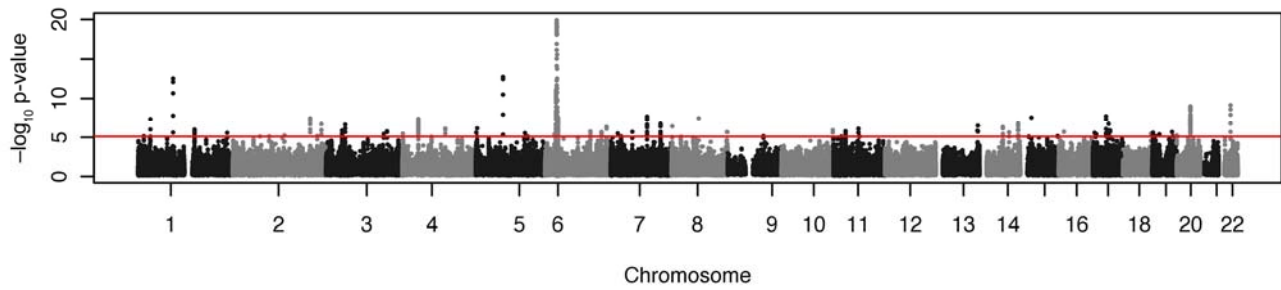

**Supplementary Figure 3.** Minimal association of disease duration with methylation levels in normal-appearing white matter. The x-axis shows autosomal chromosomes and y-axis the  $-\log_{10}$ (p-value). Each dot represents nominal Fisher's combined p-value for CpGs within a 1-kb sliding window, where individual p-values were generated using the correlation between disease duration and methylation across the genome. The red line denotes 5% FDR.

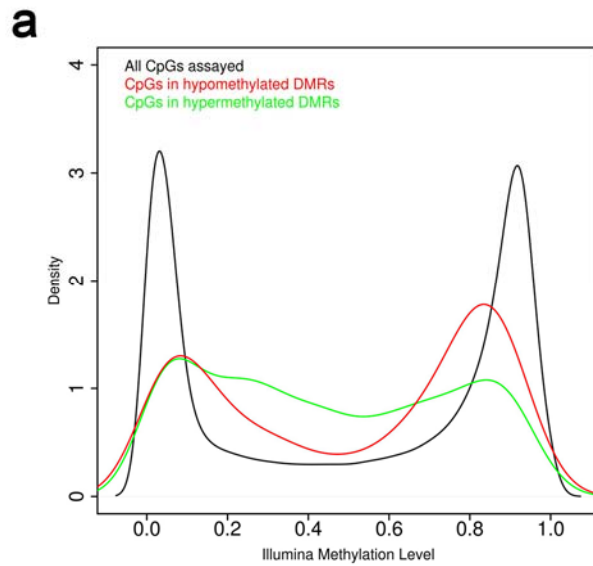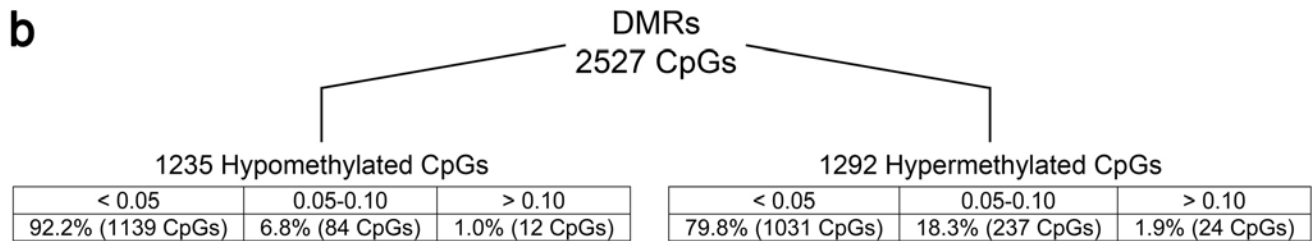

**Supplementary Figure 4.** Distribution of methylation difference between multiple sclerosis and controls reveal most changes to be subtle. (a) Density plots based on  $\beta$ -values obtained from 461,272 autosomal CpGs show a bimodal distribution of DNA methylation levels in the genome (black). Density plots of CpGs within hypomethylated (red) and hypermethylated (green) DMRs show a significantly different distribution ( $p < 10^{-10}$ , Kolmogorov-Smirnov test), with an excess of intermediate methylation levels. (b) Difference taken as the  $\beta$ -value average of MS minus the  $\beta$ -value average of controls. Distribution of methylation level difference for each CpG identified in differentially methylated regions are divided into three categories:  $< 0.05$ ,  $0.05-0.10$ , or  $> 0.10$ .

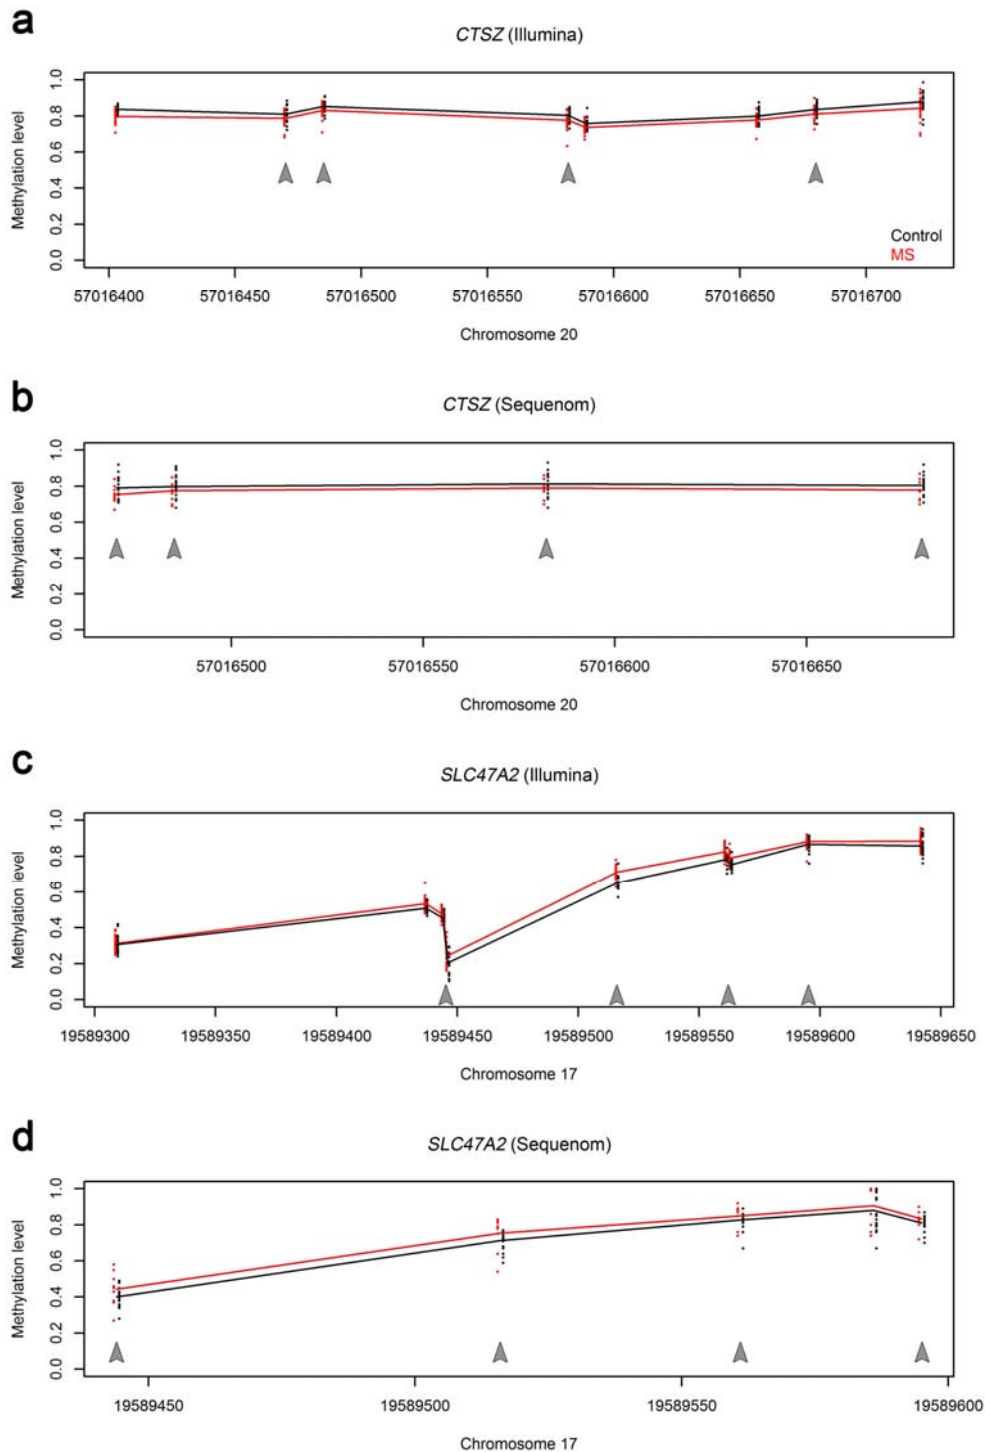

**Supplementary Figure 5.** Validation of changes in DNA methylation between multiple sclerosis and controls in an independent cohort of samples. (a) Plot of DNA methylation levels for individual CpGs within a window of the *CTSZ* DMR as measured by Illumina array of the discovery cohort. Methylation levels for individual MS cases and controls are plotted in red and black, respectively, with red and black lines connecting the mean methylation level for each consecutive CpG assayed. Arrowheads indicate CpGs that were assayed in a second cohort (b). (b) Methylation levels for individual CpGs assessed using MassARRAY EpiTYPER of a second cohort. Plots are as shown in (a) for the CpGs marked by arrowheads. Arrowheads indicate CpGs with corresponding Illumina probes in (a). (c–d) Same as described in (a,b) for a window of the *SLC47A2* DMR. MS, multiple sclerosis.



**Supplementary Table 1.** Description of MS and non-neurological control samples assessed with Illumina Infinium HumanMethylation450 BeadChip.

| Patient ID | Gender | Age | MS type | MS duration (yrs) | Post-mortem interval (hrs) | Additional Diagnosis                              |
|------------|--------|-----|---------|-------------------|----------------------------|---------------------------------------------------|
| MS4218     | F      | 63  | CP      | 18                | 15                         | Cerebral atherosclerosis, chronic UTI             |
| MS3931     | F      | 74  | PP      | 11                | 9.5                        | Pneumonia                                         |
| MS2771     | F      | 64  | SP      | 33                | 17.3                       |                                                   |
| MS377      | F      | 50  | SP      | NA                | 22                         | Pneumonia                                         |
| MS094      | F      | 42  | PP      | 6                 | 11                         | Bronchopneumonia                                  |
| MS088      | F      | 54  | SP      | NA                | 22                         | Bronchopneumonia                                  |
| MS342      | F      | 35  | SP      | 5                 | 9                          |                                                   |
| MS076      | F      | 49  | SP      | 18                | 31                         | Chronic renal failure, heart disease              |
| MS058      | F      | 51  | SP      | 21                | 15                         |                                                   |
| MS4201     | F      | 75  | CP      | 29                | 13.8                       | Chronic UTI, HPN, hypothyroidism, migraine        |
| MS3010     | F      | 50  | SP      | 24                | 15                         |                                                   |
| MS062      | F      | 49  | SP      | 19                | 10                         | Respiratory infection                             |
| MS2765     | F      | 51  | CP      | 32                | 9                          |                                                   |
| MS109      | F      | 60  | SP      | 25                | 22                         | Cerebral atherosclerosis, MI                      |
| MS3840     | F      | 61  | PP      | 17                | 22.8                       | Chronic UTI, Pneumonia                            |
| MS093      | F      | 57  | SP      | 26                | 25                         | Pneumonia                                         |
| MS231      | F      | 59  | PP      | 27                | 12                         | Bronchopneumonia                                  |
| MS273      | M      | 61  | PP      | 31                | 24                         | Septicemia, UTI                                   |
| MS097      | M      | 55  | SP      | 22                | 31                         | Bronchopneumonia                                  |
| MS286      | M      | 45  | SP      | 16                | 7                          |                                                   |
| MS2946     | M      | 59  | PP      | 12                | 15                         | Dementia                                          |
| MS3502     | M      | 78  | SP      | 52                | 15.5                       | Bell's Palsy, CVA, seizure disorder               |
| MS100      | M      | 46  | SP      | 8                 | 7                          | Acute polyarthritis, peptic ulceration, pneumonia |
| MS141      | M      | NA  | NA      | NA                | NA                         |                                                   |
| MS083      | M      | 54  | PP      | 16                | 13                         | Bronchopneumonia                                  |
| MS060      | M      | 55  | SP      | 43                | 16                         |                                                   |
| MS122      | M      | 44  | SP      | 10+               | 16                         | Bronchopneumonia                                  |
| MS104      | M      | 53  | SP      | 11                | 12                         | UTI                                               |
| N3175      | F      | 54  | -       | -                 | 21.5                       | Hypothyroidism, pancytopenia, T1DM                |
| N3348      | F      | 76  | -       | -                 | 9                          | CHD, HPN, T1DM                                    |
| PDC08      | F      | 71  | -       | -                 | NA                         | Cerebral atherosclerosis                          |
| N3406      | F      | 72  | -       | -                 | 20.1                       | Breast cancer, CHF, TSC                           |
| N3482      | F      | 79  | -       | -                 | 14                         | CHD, HPN                                          |
| N3558      | F      | 59  | -       | -                 | 19.5                       | Non-Hodgkin's lymphoma                            |
| N3543      | F      | 73  | -       | -                 | 12                         | COPD                                              |
| CO14       | M      | 64  | -       | -                 | 18                         | MI, TIA                                           |
| PDC05      | M      | 58  | -       | -                 | NA                         | Cervical ependymoma                               |
| CO51       | M      | 68  | -       | -                 | 24                         | IHD                                               |
| N3276      | M      | 54  | -       | -                 | 19                         | CHD, CKD, PVD                                     |

|        |   |    |   |   |      |                                |
|--------|---|----|---|---|------|--------------------------------|
| N3602  | M | 66 | - | - | 13.1 | Metastatic larynx cancer, T1DM |
| CO36   | M | 68 | - | - | 30   | CAD, cor pulmonale, IPF        |
| N3529  | M | 58 | - | - | 9    | Colon cancer                   |
| N3611  | M | 64 | - | - | 17.5 | CAD, lymphoma                  |
| N3535  | M | 81 | - | - | 14   | Non-Hodgkin's lymphoma         |
| N3606  | M | 71 | - | - | 11.5 | COPD                           |
| N3589  | M | 53 | - | - | 15   | Melanoma                       |
| PDC022 | M | 71 | - | - | NA   |                                |

CP=chronic progressive. PP=primary progressive. SP=secondary progressive. NA=not available. UTI=urinary tract infection. HPN=hypertension. MI=myocardial infarction. CVA=cerebral vascular accident. T1DM=type 1 diabetes mellitus. CHD=coronary heart disease. CHF=congestive heart failure. TSC=tuberous sclerosis complex. COPD=chronic obstructive pulmonary disease. TIA=transient ischemic attack. IHD=ischemic heart disease. CKD=chronic kidney disease. PVD=peripheral vascular disease. CAD=coronary artery disease. IPF=idiopathic pulmonary fibrosis.

**Supplementary Table 4.** Description of MS and non-neurological control samples used for independent validation.

| Patient ID | Gender | Age | MS type | MS duration (yrs) | Post-mortem interval (hrs) | Additional Diagnosis |
|------------|--------|-----|---------|-------------------|----------------------------|----------------------|
| M1         | F      | 70  | SP      | 45                | 4.3                        |                      |
| M2         | F      | 51  | SP      | 25                | 5.5                        |                      |
| M4         | F      | 46  | SP      | 14                | 5.6                        |                      |
| M5         | F      | 56  | SP      | 27                | 4.5                        |                      |
| M7         | F      | 66  | SP      | 35                | 13.3                       |                      |
| M11        | F      | 65  | SP      | 10                | 9.2                        |                      |
| M12        | F      | 73  | SP      | 46                | 7                          |                      |
| M3         | M      | 52  | SP      | 25                | 4.8                        |                      |
| M8         | M      | 61  | SP      | 6                 | 9.3                        |                      |
| M10        | M      | 53  | SP      | 13                | 17.7                       |                      |
| N19        | F      | 48  | -       | -                 | 28.8                       |                      |
| N21        | F      | 43  | -       | -                 | 28                         |                      |
| N25        | F      | 66  | -       | -                 | 22.6                       |                      |
| N27        | F      | 68  | -       | -                 | 24                         |                      |
| N28        | F      | 73  | -       | -                 | 28.3                       |                      |
| N41        | F      | 73  | -       | -                 | 3                          |                      |
| N42        | F      | 67  | -       | -                 | 16.5                       |                      |
| N49        | F      | 61  | -       | -                 | 25.1                       |                      |
| N6         | F      | 64  | -       | -                 | 19.1                       |                      |
| N69        | F      | 60  | -       | -                 | 14.9                       |                      |
| N7         | F      | 73  | -       | -                 | 3.4                        |                      |
| N71        | F      | 45  | -       | -                 | 32                         |                      |
| N77        | F      | 52  | -       | -                 | 24.3                       |                      |
| N83        | F      | 66  | -       | -                 | 16                         |                      |
| N53        | M      | 53  | -       | -                 | 20.2                       |                      |
| N55        | M      | 51  | -       | -                 | 13.8                       |                      |
| N58        | M      | 53  | -       | -                 | 15.2                       |                      |
| N64        | M      | 53  | -       | -                 | 17.5                       |                      |
| N79        | M      | 61  | -       | -                 | 24.1                       |                      |
| N8         | M      | 61  | -       | -                 | 18.8                       |                      |

SP=secondary progressive.



**Supplementary Table 5.** Description of MS and non-neurological control samples used for independent validation.

| <b>Patient ID</b> | <b>Gender</b> | <b>Age</b> | <b>MS type</b> | <b>MS duration (yrs)</b> | <b>Post-mortem interval (hrs)</b> | <b>Additional Diagnosis</b> |
|-------------------|---------------|------------|----------------|--------------------------|-----------------------------------|-----------------------------|
| MS1               | F             | 61         | SP             | NA                       | 10                                |                             |
| MS2               | M             | 46         | SP             | NA                       | 3                                 |                             |
| MS3               | M             | 49         | RR             | NA                       | 18.8                              |                             |
| MS4               | F             | 57         | PP             | NA                       | 5.5                               |                             |
| MS5               | M             | 56         | SP             | NA                       | 3.1                               |                             |
| C1                | F             | 47         | -              | -                        | 15                                |                             |
| C2                | M             | 53         | -              | -                        | 12                                |                             |
| C3                | M             | 77         | -              | -                        | 12                                |                             |

SP=secondary progressive. RR=relapsing remitting. PP=primary progressive.
